# Supplementary material for: In situ identification of the electrocatalytic water oxidation behavior of a nickel-based metal–organic framework nanoarray
Source: Royal Society of Chemistry journal article supplement (doi:10.1039/d0mh01757d), 2020-12-14
Supplement: d0mh01757d1.pdf [file d0mh01757d1.pdf]

## Supporting Information

### ***In situ* Identification of Electrocatalytic Water Oxidation Behavior of Nickel-Based Metal-Organic Framework Nanoarray**

Fanpeng Cheng,<sup>1</sup> Zhongjian Li,<sup>1\*</sup> Lin Wang,<sup>1</sup> Bin Yang,<sup>1,2</sup> Jianguo Lu,<sup>3</sup> Lecheng Lei,<sup>1,2</sup> Tianyi Ma,<sup>4\*</sup> Yang Hou<sup>1,2,5\*</sup>

<sup>1</sup>Key Laboratory of Biomass Chemical Engineering of Ministry of Education, College of Chemical and Biological Engineering, Zhejiang University, Hangzhou 310027, China

<sup>2</sup>Institute of Zhejiang University - Quzhou, Quzhou 324000, China

<sup>3</sup>State Key Laboratory of Silicon Materials, School of Materials Science and Engineering, Zhejiang University, Hangzhou 310027, China

<sup>4</sup>Centre for Translational Atomaterials, Faculty of Science, Engineering and Technology, Swinburne University of Technology, Hawthorn, Victoria, 3122, Australia. E-mail: tianyima@swin.edu.au

<sup>5</sup>The Ningbo Research Institute, Zhejiang University, Ningbo 315100, China

## Experimental section

**Synthesis of OG.** Graphite foil was firstly rinsed with acetone, ethanol, and deionized (DI) water under sonication for 20 min, respectively, and then dried in oven at 60 °C for 4 h. Next, an electrochemical exfoliation process was conducted by anodization of graphite foil in concentrated sulfuric acid with using Pt foil (10 mm × 10 mm) as counter electrode and graphite foil (30 mm × 30 mm) as working electrode under 5 V for 1 min.<sup>1</sup> The obtained electrode was rinsed with DI water several times and dried in oven at 60 °C.

**Synthesis of NiBDC/OG.** 119 mg of NiCl<sub>2</sub>·6H<sub>2</sub>O and 116 mg of 1,4-dicarboxybenzene acid (BDC) were dissolved in a mixed solvent of DI water, ethanol, and N,N-dimethylformamide (DMF) (18 mL, V:V:V = 1:1:16), and stirred for 20 min to form transparent solution. Then, as-obtained solution with a piece of OG foil (15 mm × 30 mm) was transferred into a Teflon-lined autoclave. Subsequently, the Teflon-lined autoclave was heated at 150 °C for 3 h in an oven, which was naturally cooled down to room temperature. The resulting electrode was washed with DMF, ethanol, and DI water, repeatedly, and then dried in oven at 60 °C. The loading amount of NiBDC on OG foil was ~0.64 mg cm<sup>-2</sup>.

**Synthesis of Ce-NiBDC/OG.** 119 mg of NiCl<sub>2</sub>·6H<sub>2</sub>O, 6.5 mg of Ce(NO<sub>3</sub>)<sub>3</sub>·6H<sub>2</sub>O, and 116 mg of 1,4-dicarboxybenzene acid (BDC) were dissolved in a mixed solvent of DI water, ethanol, and N,N-dimethylformamide (DMF) (18 mL, V:V:V = 1:1:16), and stirred for 20 min to form the transparent solution. Then, as-obtained solution with a piece of OG foil (15 mm × 30 mm) was transferred into a Teflon-lined autoclave. Subsequently, the Teflon-lined autoclave was heated at 150 °C for 3 h in an oven, which was naturally cooled down to room temperature. The resulting electrode was washed with DMF, ethanol, and DI water, repeatedly, and then dried in oven at 60 °C. The loading amount of Ce-NiBDC on OG foil was ~0.72 mg cm<sup>-2</sup>.

The precursor ratio of Ce<sup>3+</sup> to Ni<sup>2+</sup> was regulated from 1% to 12% to synthesize the Ce-NiBDC with different molar ratios of Ce to Ni. Besides, we replaced the Ce(NO<sub>3</sub>)<sub>3</sub>·6H<sub>2</sub>O with MoCl<sub>5</sub>, WCl<sub>6</sub>, Cr(NO<sub>3</sub>)<sub>3</sub>·9H<sub>2</sub>O, CuCl<sub>2</sub>·2H<sub>2</sub>O, CoCl<sub>2</sub>·6H<sub>2</sub>O, or Fe(NO<sub>3</sub>)<sub>3</sub>·9H<sub>2</sub>O to synthesize the X-NiBDC/OG (X = Mo, W, Cr, Cu, Co, Fe).

The synthesis of Ce-NiBDC/OG-120 °C is similar to the synthesis of Ce-NiBDC/OG catalyst except the hydrothermal temperature was changed to 120 °C. The synthesis of Ce-NiBDC/OG-180 °C is similar to the synthesis of Ce-NiBDC/OG catalyst except the hydrothermal temperature was changed to 180 °C.

**Synthesis of CeBDC/OG.** 217 mg of Ce(NO<sub>3</sub>)<sub>3</sub>·6H<sub>2</sub>O and 116 mg of 1,4-dicarboxybenzene acid (BDC) were dissolved in a mixed solvent of DI water, ethanol, and N,N-dimethylformamide (DMF) (18 mL, V:V:V = 1:1:16), and stirred for 20 min to form transparent solution. Then, as-obtained solution with a piece of OG foil (15 mm × 30 mm) was transferred into a Teflon-lined autoclave. Subsequently, the Teflon-lined autoclave was heated at 150 °C for 3 h in an oven, which was naturally cooled down to room temperature. The resulting electrode was washed with DMF, ethanol, and DI water, repeatedly, and then dried in oven at 60 °C. The loading amount of CeBDC on OG foil was ~0.54 mg cm<sup>-2</sup>.

**Characterizations:** The morphologies of samples were examined by FESEM (Hitachi SU-8010), TEM (HT7700), and HRTEM (JEOL JEM-2001F). The crystal structures of catalysts were measured by XRD (Empyrean 200895) using Cu K $\alpha$  radiation. The chemical environments of samples were measured by XPS (Escalab 250Xi) with Al K $\alpha$  radiation. Raman spectra of samples were measured with a LabRAM HR Evolution. The N<sub>2</sub> adsorption-desorption curves of samples were tested by BET (ASIC-2). The metal content in catalysts was analyzed by ICP-MS (Vista Axial). XAS measurements of Ce-NiBDC/OG and the control samples were tested in Beijing Synchrotron Radiation Facility and Shanghai Synchrotron Radiation Facility.

**Electrochemical measurements:** All electrochemical measurements were carried out by an electrochemical analyzer (CHI 760E) in a typical three-electrode configuration. A saturated Ag/AgCl electrode and a graphite rod were used as reference electrode and counter electrode, respectively. The potential was converted to reversible hydrogen electrode (RHE) via a Nernst equation ( $E_{\text{RHE}} = E_{\text{Ag/AgCl}} + 0.059 \times \text{pH} + 0.197$ ). To evaluate the OER activities of catalysts, the scan rate of linear sweep voltammetry (LSV) was set to 1.0 mV s<sup>-1</sup> with the potentials between 0 V and 0.8 V vs. Ag/AgCl in 1.0 M KOH. Electrochemical impedance spectroscopy (EIS) was

measured at 0.5 V vs. Ag/AgCl with a frequency range from  $10^5$  Hz to 0.01 Hz. All polarization curves were calibrated with iR correction unless noted. Cyclic voltammetry cycles (CVs) at 0.8 V - 1.0 V vs. RHE with the scan rates from 20 - 100  $\text{mV s}^{-1}$  was applied to analyze electrochemically active surface area (ECSA).

**Calculation method:** The present DFT calculations based on the first principle are performed by Vienna Ab initio Simulation Package (VASP) with the projector augmented wave (PAW) method.<sup>2, 3</sup> The exchange-functional is treated using the generalized gradient approximation (GGA) of Perdew-Burke-Ernzerhof (PBE) functional.<sup>4</sup> The energy cutoff for the plane wave basis expansion is set to 450 eV and the force on each atom less than  $0.03 \text{ eV \AA}^{-1}$  is set for the convergence criterion of geometry relaxation. The Brillouin zone integration is performed using  $3 \times 3 \times 1$  k-point sampling through all the computational processes of OER. The supercell is constructed by a five-layer  $3 \times 1$  NiOOH (011) slab and a 15 Å vacuum, in order to avoid the interaction between periodic structures. The self-consistent calculations apply a convergence energy threshold of  $10^{-4}$  eV. To describe vdW interaction, empirical Grimme's D3 correction is adopted. The Free energies of the OER steps are calculated using equation:<sup>5</sup>

$$\Delta G = \Delta E_{DFT} + \Delta E_{ZPE} - T\Delta S$$

where  $\Delta E_{DFT}$  is the DFT energy difference, and the  $\Delta E_{ZPE}$  and  $T\Delta S$  terms are obtained based on vibration analysis. The corrections of zero point energy and entropy of different species are shown in Table S4.

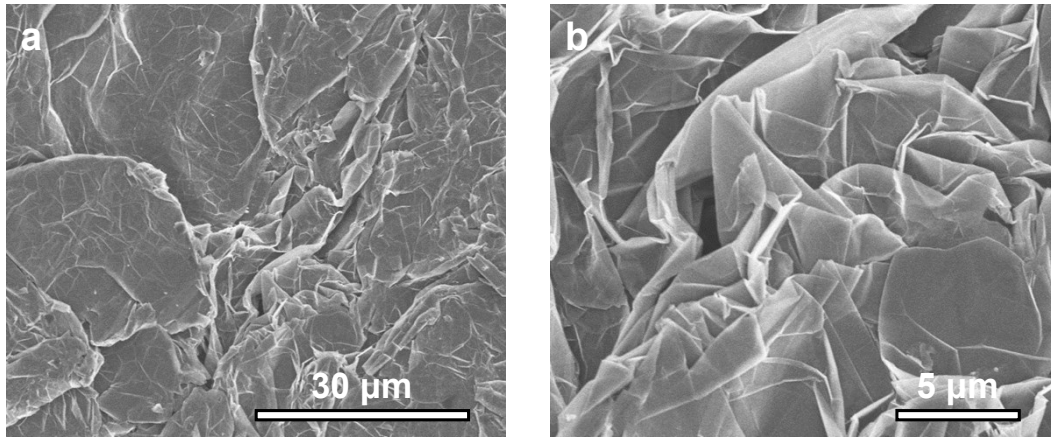

**Figure S1.** (a-b) FESEM images of 3D OG foil.

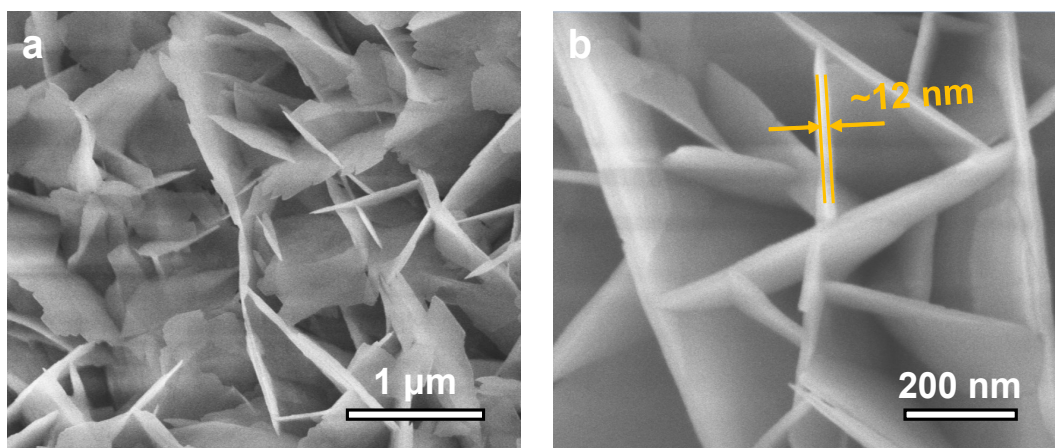

**Figure S2.** (a-b) FESEM images of Ce-NiBDC/OG.

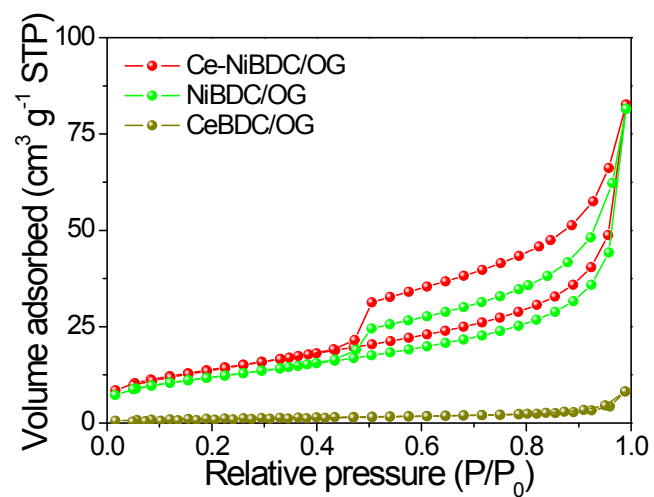

**Figure S3.** N<sub>2</sub> adsorption-desorption isotherm curves of Ce-NiBDC/OG, NiBDC/OG, and CeBDC/OG.

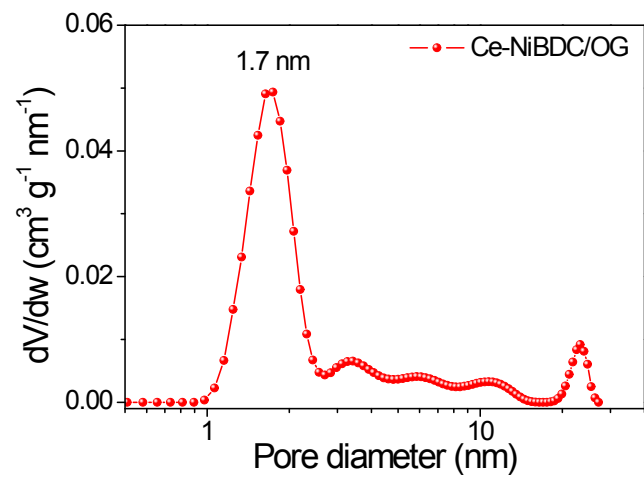

**Figure S4.** Pore size distribution of Ce-NiBDC/OG.



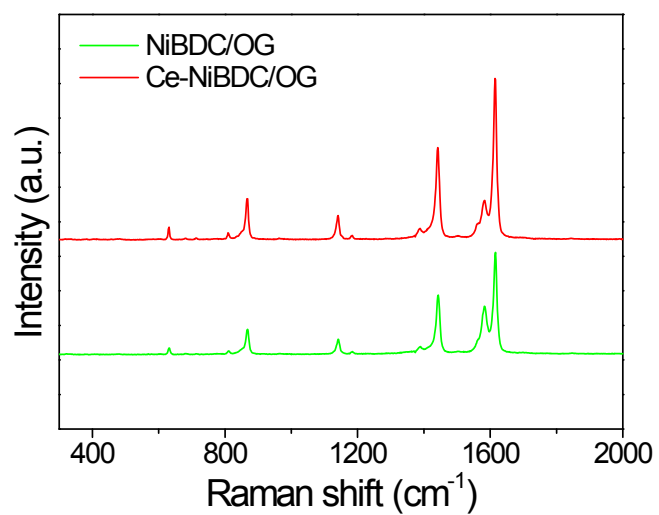

**Figure S5.** Raman spectra of Ce-NiBDC/OG and NiBDC/OG.

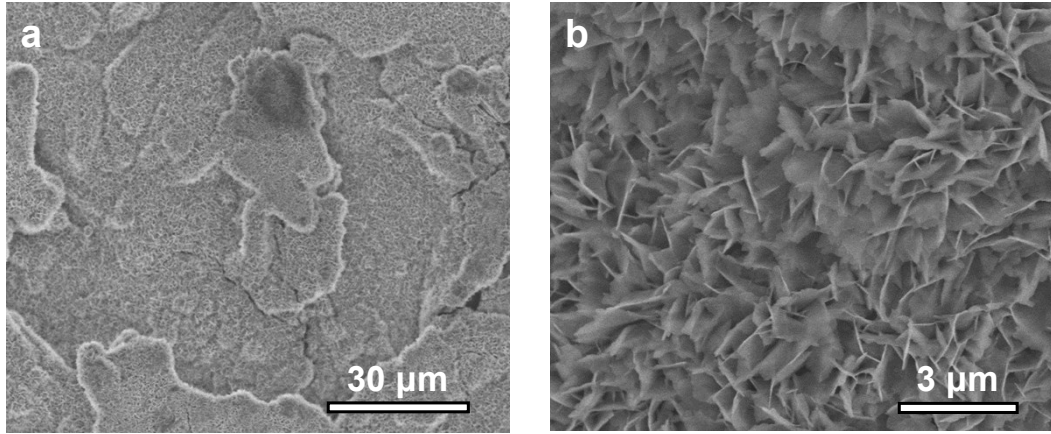

**Figure S6.** (a-b) FESEM images of NiBDC/OG.

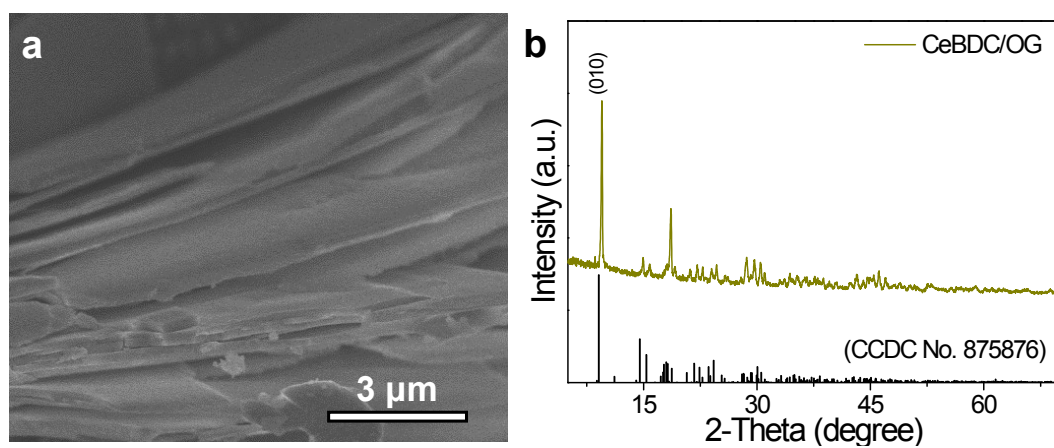

**Figure S7.** (a-b) FESEM image and XRD pattern of CeBDC/OG.

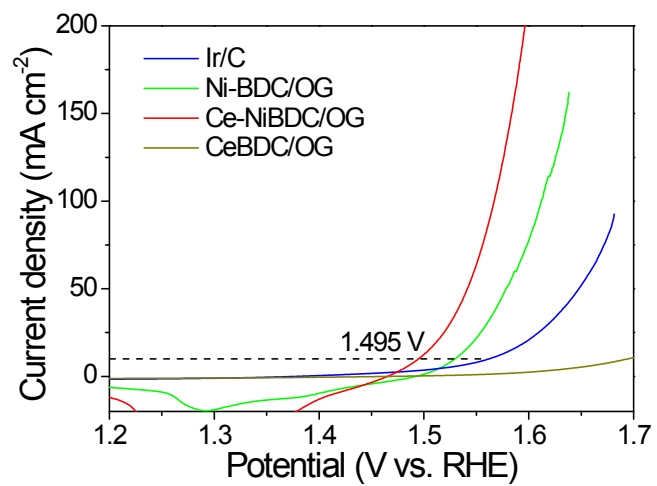

**Figure S8.** Reverse polarization curves of Ir/C, NiBDC/OG, Ce-NiBDC/OG, and CeBDC/OG.

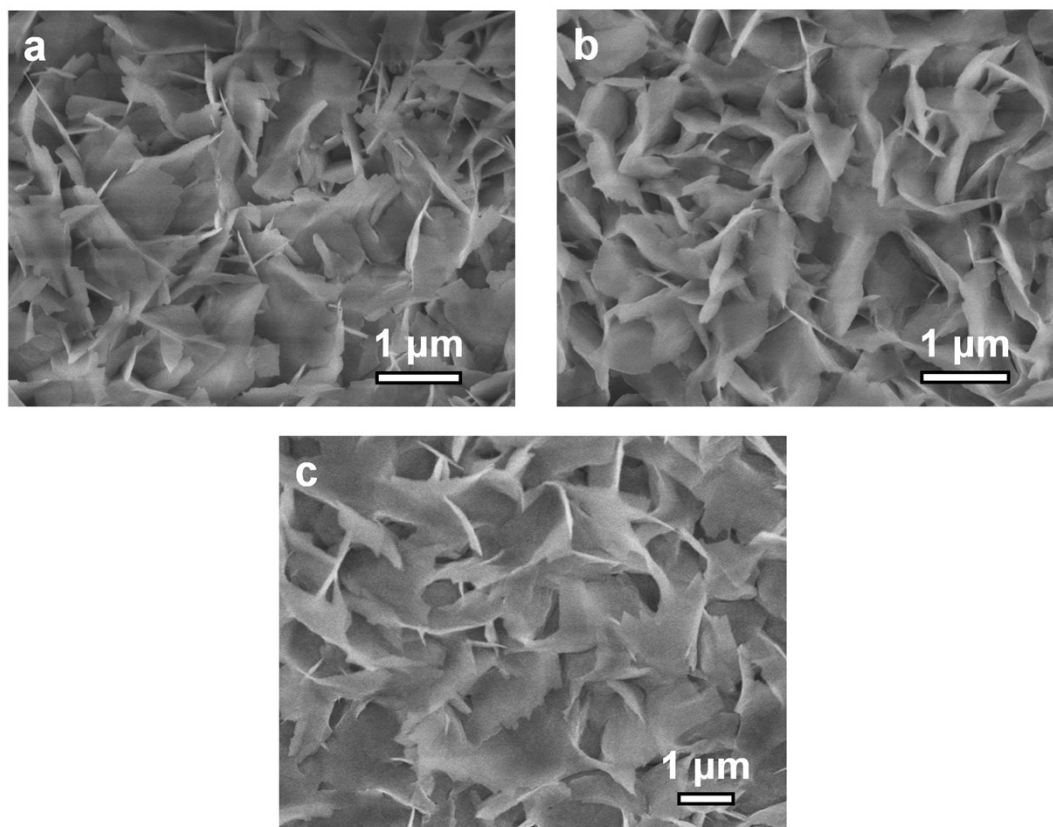

**Figure S9.** FESEM images of (a) 0.66 wt.% Ce doping, (b) 3.33 wt.% Ce doping, and (c) 5.12 wt.% Ce doping.

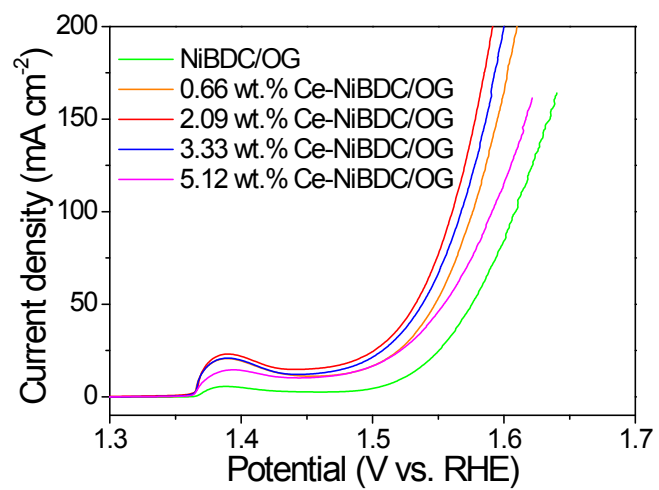

**Figure S10.** Polarization curves of NiBDC/OG with different loading amounts of Ce species.

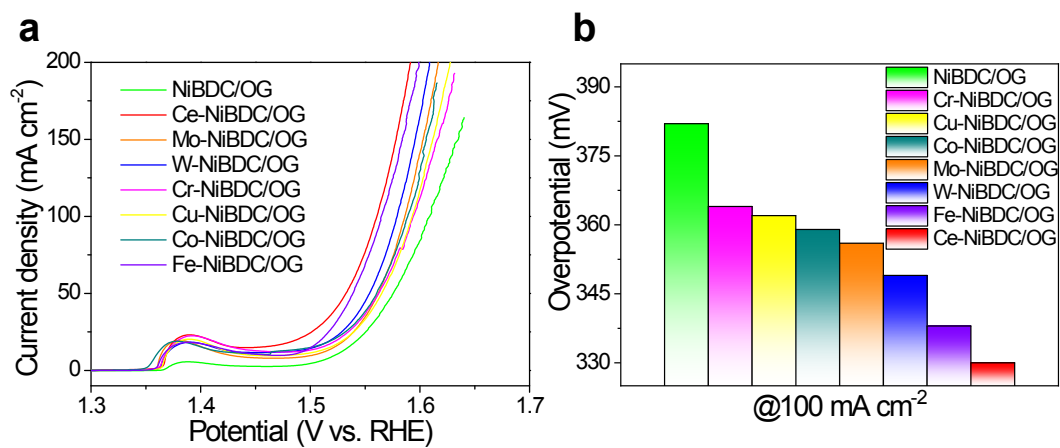

**Figure S11.** (a) Polarization curves of NiBDC/OG with different metal doping. (b) Corresponding overpotentials at 100 mA cm<sup>-2</sup>.

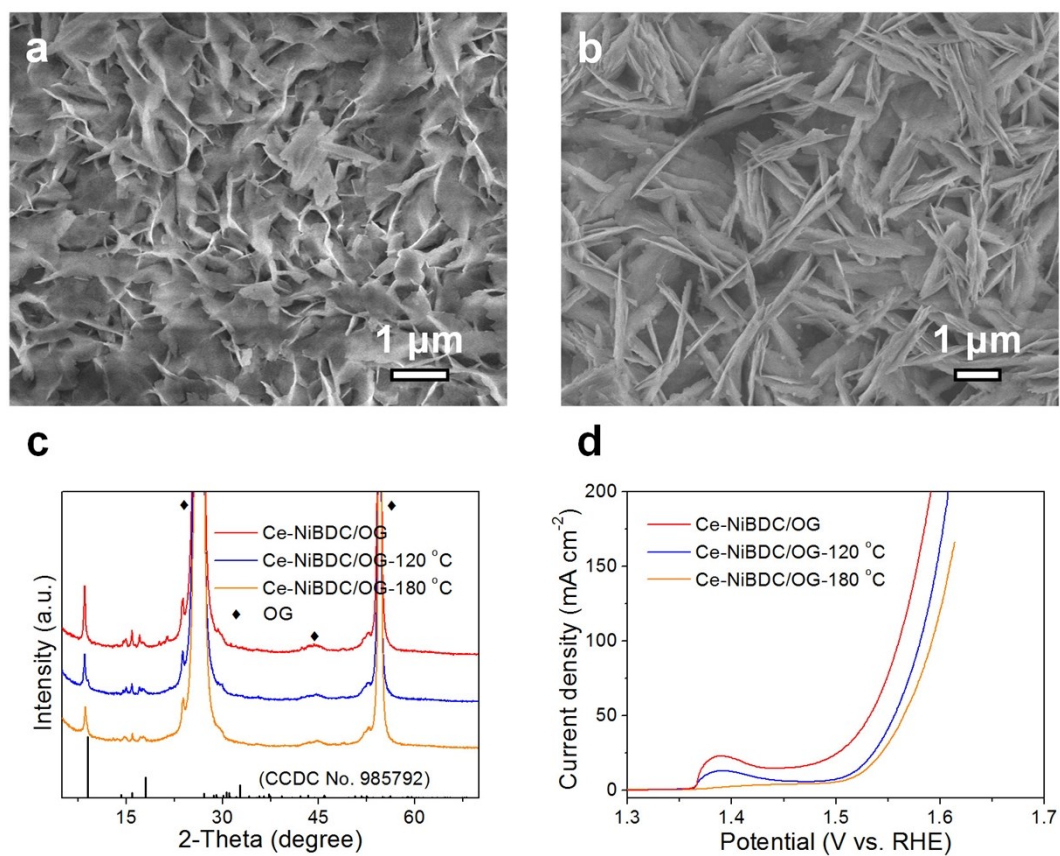

**Figure S12.** FESEM images of Ce-NiBDC/OG synthesized under different temperatures for (a) Ce-NiBDC/OG-120 °C and (b) Ce-NiBDC/OG-180 °C. (c) XRD patterns and (d) polarization curves of Ce-NiBDC/OG, Ce-NiBDC/OG-120 °C, and Ce-NiBDC/OG-180 °C.



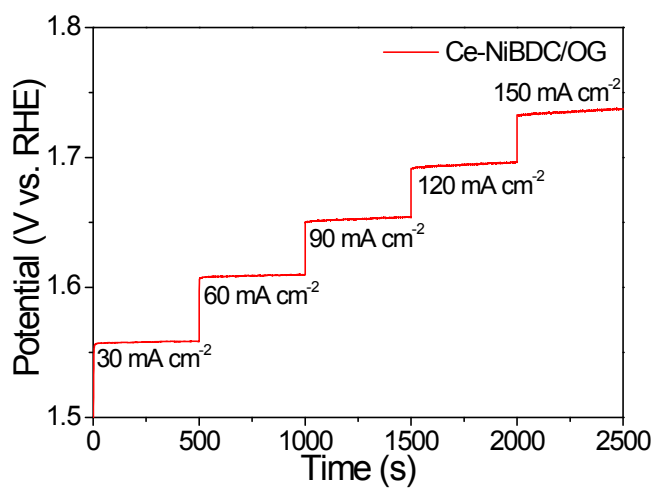

**Figure S13.** Multi-step chronopotentiometric curve of Ce-NiBDC/OG.

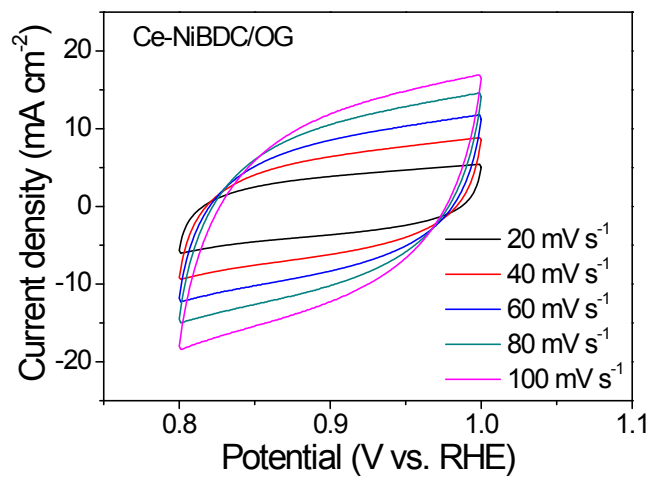

**Figure S14.** CV curves of Ce-NiBDC/OG at different scan rates in 1.0 M KOH solution.

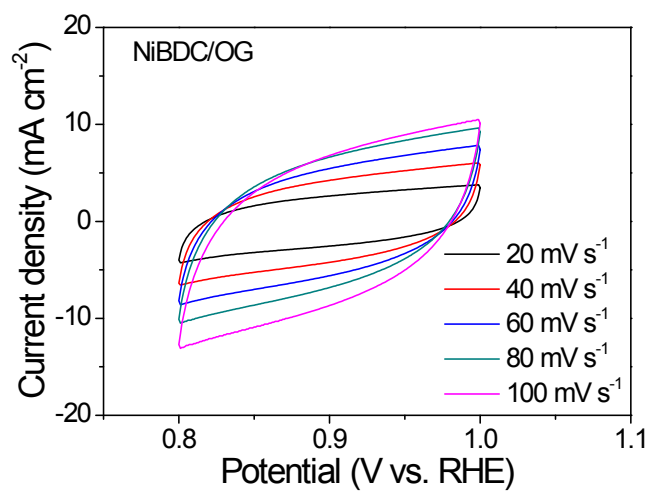

**Figure S15.** CV curves of NiBDC/OG at different scan rates in 1.0 M KOH solution.

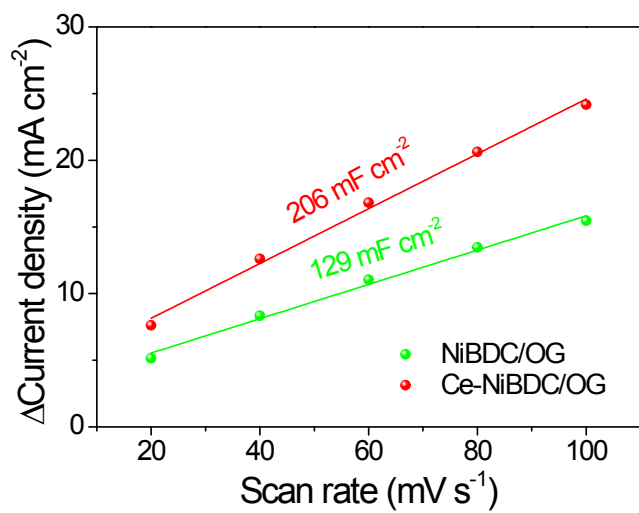

**Figure S16.** ECSAs of NiBDC/OG and Ce-NiBDC/OG.

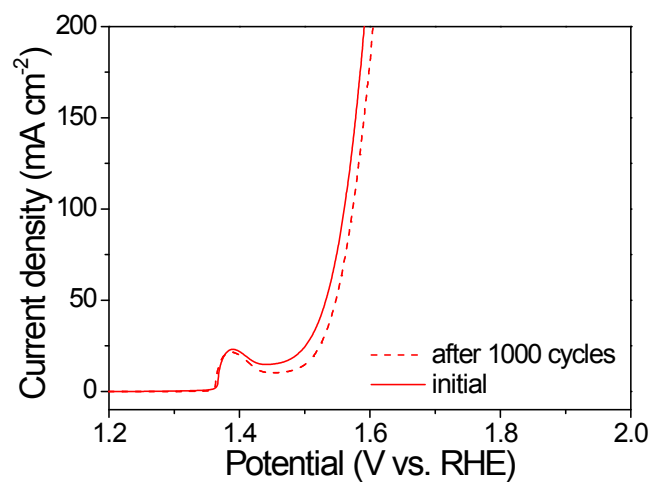

**Figure S17.** Polarization curves of Ce-NiBDC/OG before and after 1000 CV cycles.

The polarization curve of Ce-NiBDC/OG demonstrates an inconspicuous loss even after 1000 CV cycles, implying its high stability and durability for OER in alkaline media.

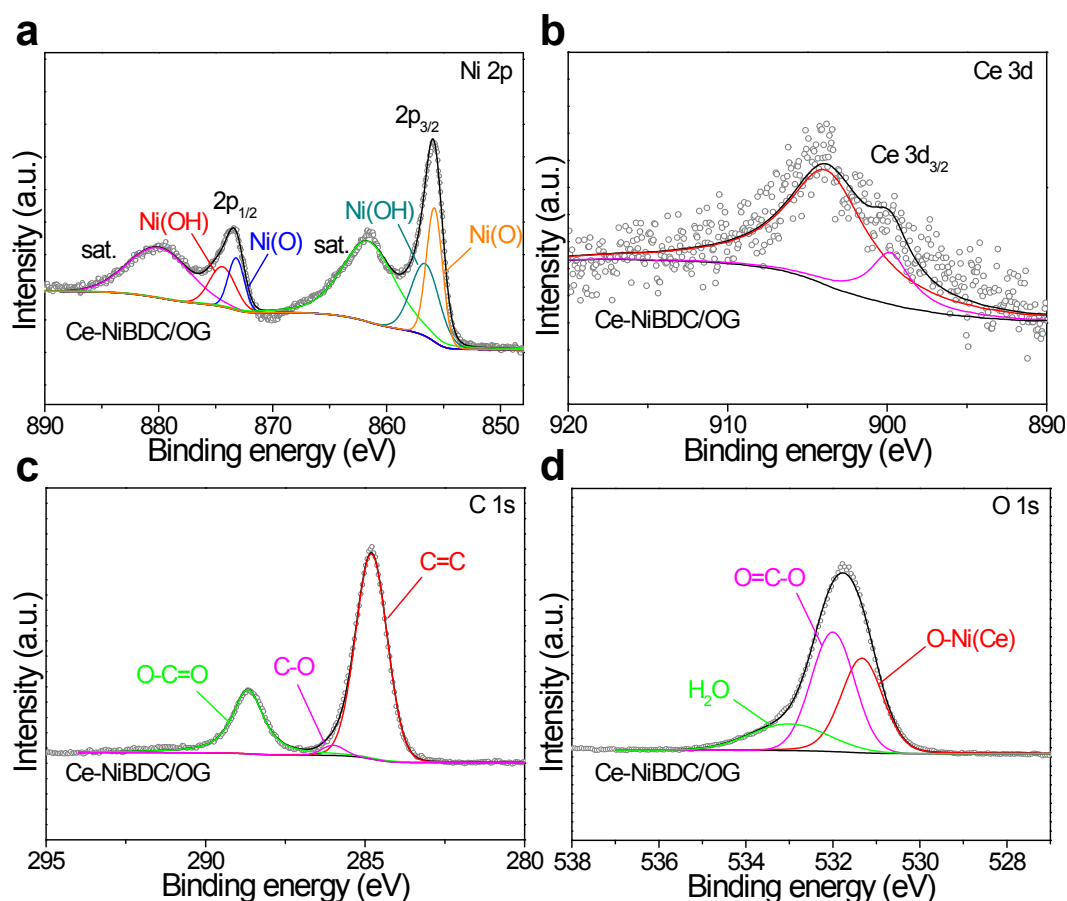

**Figure S18.** High-resolution XPS spectra for (a) Ni 2p, (b) Ce 3d, (c) C 1s, and (d) O 1s of Ce-NiBDC/OG.

The binding energies at around 855.8 eV and 873.3 eV could be assigned to the Ni-O bonds between Ni atoms and BDC molecules. The binding energies at around 856.9 eV and 874.5 eV could be assigned to the Ni-OH bonds between Ni atoms and hydroxyl groups with two shakeup satellite peaks at 880.0 and 861.6 eV.<sup>6</sup>

The high-resolution XPS spectrum of C 1s was deconvoluted into three surface components, corresponding to the benzene rings of BDC linkers at 284.8 eV, O-C=O bonds at 288.7 eV, and C-O bonds at 286.0 eV. The high-resolution XPS spectrum of O 1s could be fitted by three peaks centered at 531.3, 532, and 533.0 eV, attributed to the O atoms on the Ni(Ce)-O bonds, the carboxylate groups in BDC linkers, and absorbed water, respectively.<sup>7</sup>

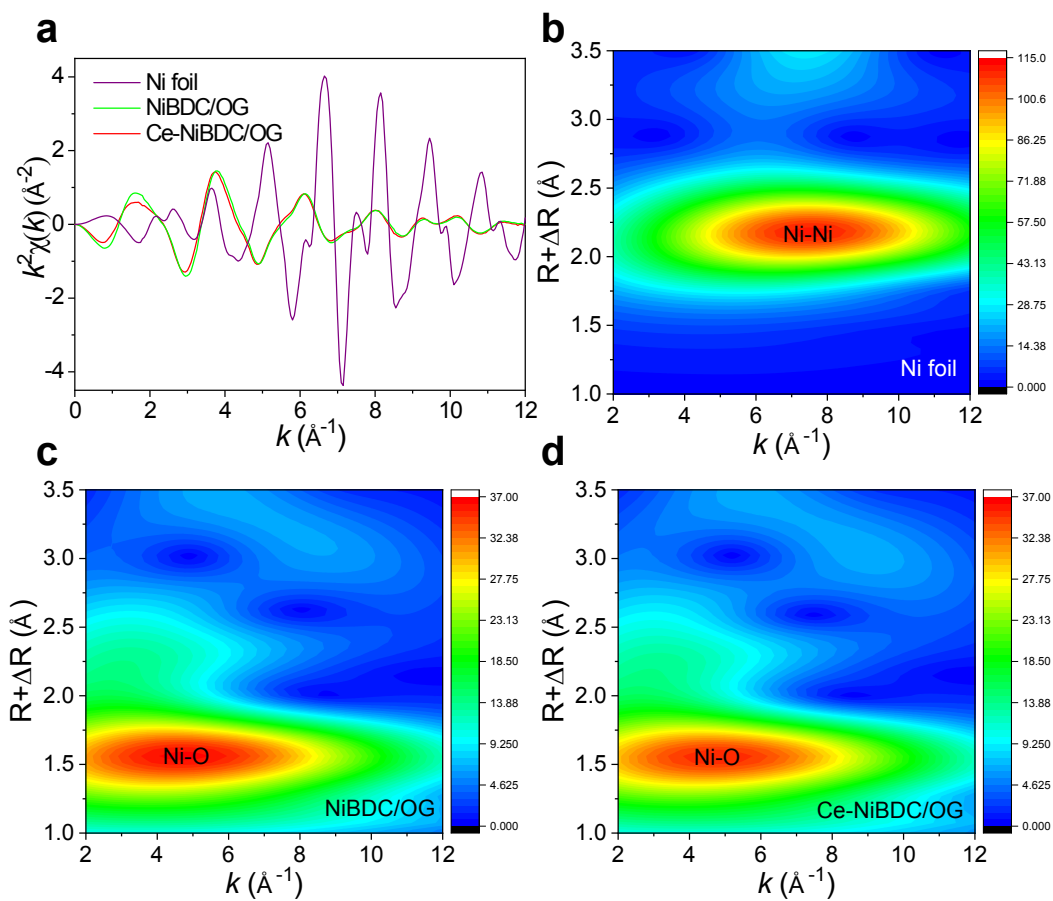

**Figure S19.** (a) The  $k$ -space of Ni K-edge EXAFS spectra and (b-d) wavelet transforms for Ni foil, NiBDC/OG, and Ce-NiBDC/OG.

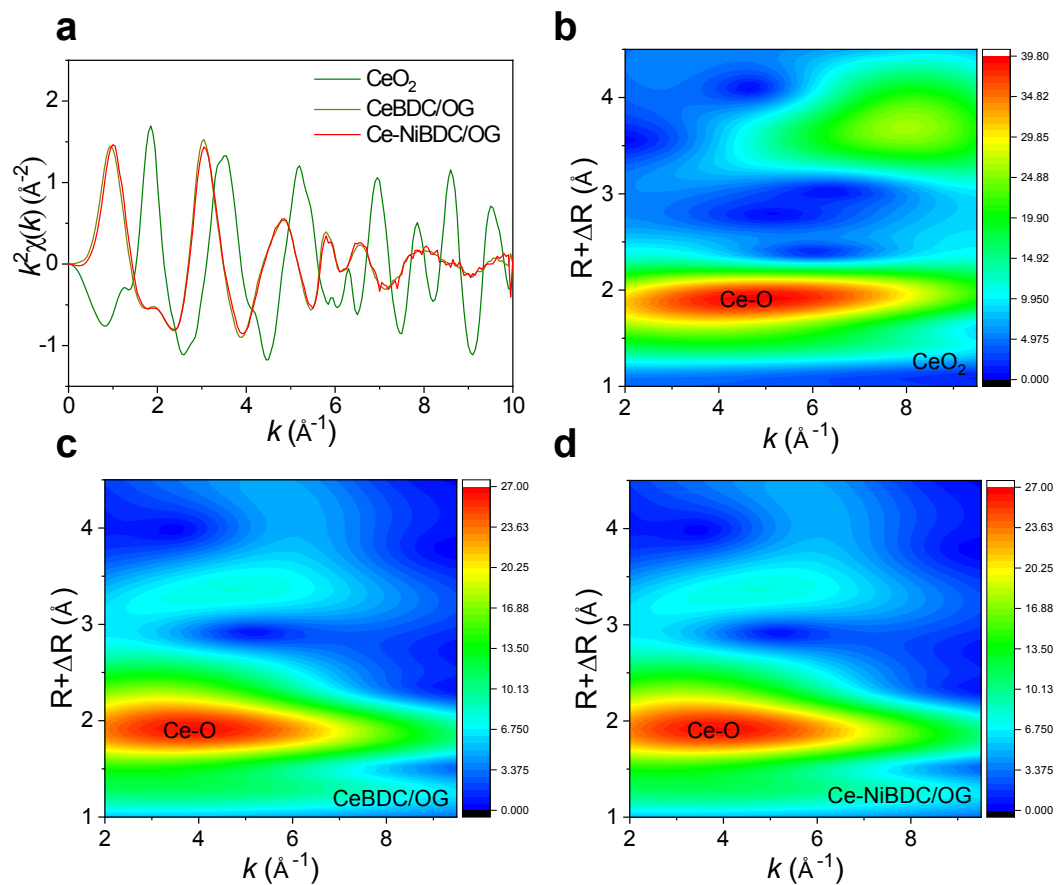

**Figure S20.** (a) The k-space of Ce L-edge EXAFS spectra and (b-d) wavelet transforms for  $\text{CeO}_2$ ,  $\text{CeBDC/OG}$ , and  $\text{Ce-NiBDC/OG}$ .



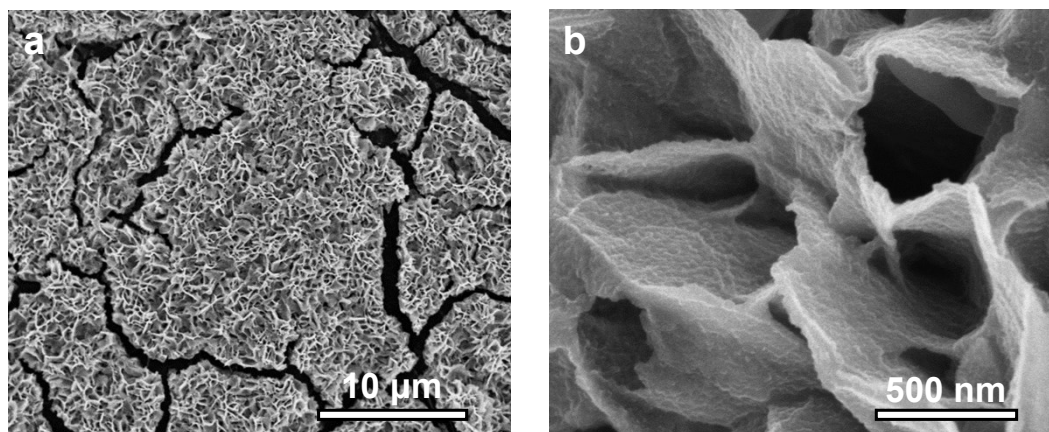

**Figure S21.** (a-b) FESEM images of Ce-NiBDC/OG after OER electrocatalysis.

The inherited nanosheets array morphology remains with the appearance of several coarse wrinkles.

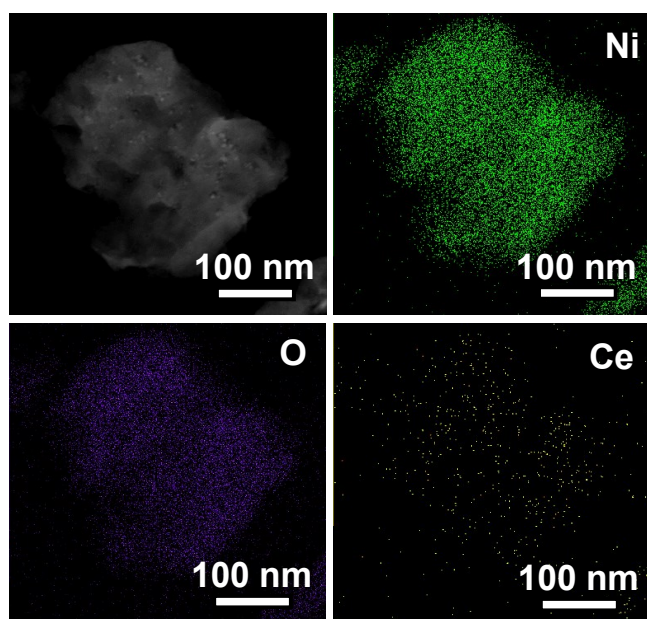

**Figure S22.** HAADF-STEM and element mapping images of Ce-NiBDC/OG after OER electrocatalysis.

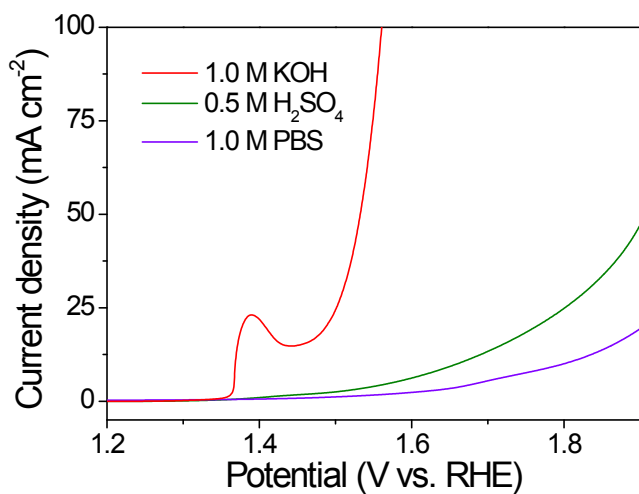

**Figure S23.** Polarization curves of Ce-NiBDC/OG in 1.0 M KOH, 0.5 M H<sub>2</sub>SO<sub>4</sub>, and 1.0 M PBS (pH = 7.0).

In both acid and neutral media, the Ce-NiBDC/OG did not show high OER activity as in alkaline media, possibly due to the incapability of phase transformation into the high-active Ce-NiOOH species that is also unstable in acid media.

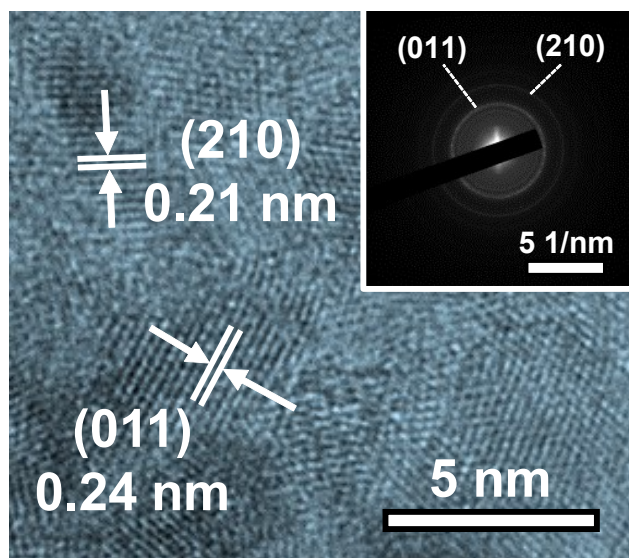

**Figure S24.** HRTEM image of Ce-NiBDC/OG after OER electrocatalysis. Inset: corresponding SAED pattern.

The post- HRTEM image of Ce-NiBDC/OG still presents the well-defined lattice fringe spacings, demonstrating good crystallinity of in-situ generated Ce-NiOOH derived from Ce-NiBDC/OG.

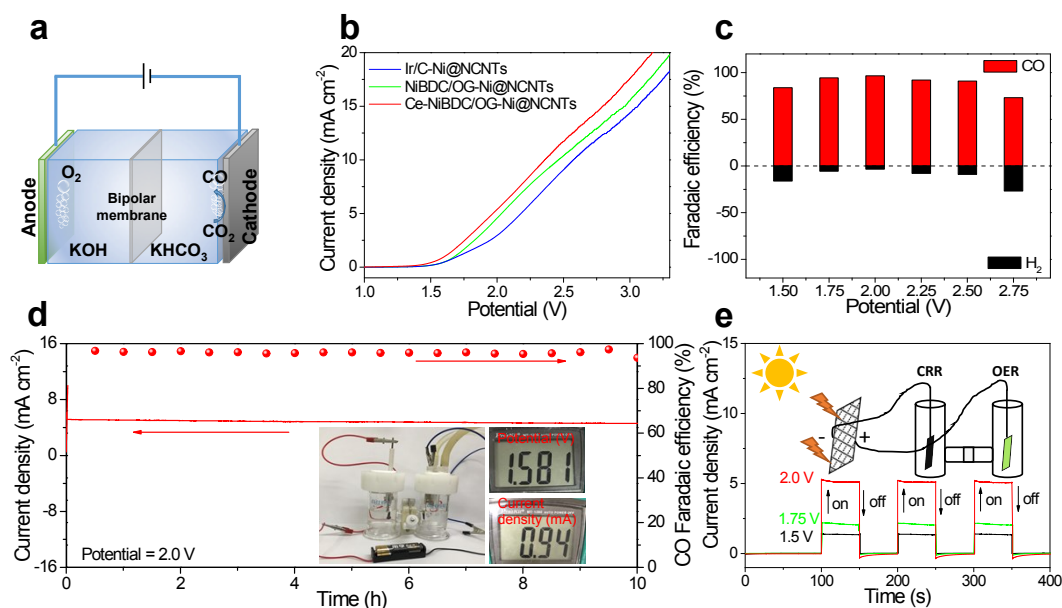

**Figure S25.** (a) Schematic illustration of alkaline-neutral OER-CRR cell. (b) Polarization curves of Ir/C-Ni@NCNTs, NiBDC/OG-Ni@NCNTs, and Ce-NiBDC/OG-Ni@NCNTs in two-electrode system. (c) CO F.E. of Ce-NiBDC/OG-Ni@NCNTs. (d) CO F.E. and chronoamperometric curve under 2.0 V. (e) Photocurrent densities of OER-CRR device at different applied potentials powered by solar panel under simulated sunlight (AM 1.5G, 100mW cm<sup>-2</sup>).

Encouraged by highly efficient OER activity of Ce-NiBDC/OG, we further established a fuel cell that combined Ni@NCNTs as cathode for CO<sub>2</sub> electroreduction and Ce-NiBDC/OG as anode for OER. For OER reaction, compared with that of Ir/C (2.58 V) and NiBDC/OG (2.46 V), a low potential of 2.36 V was required to reach 10 mA cm<sup>-2</sup> for Ce-NiBDC/OG. The Ni@NCNTs can achieve high selectivity for CO production with the maximum Faradaic efficiency (F.E.) of 96.55% at 2.0 V, which can be started by one battery. Additionally, the current density under 2.0 V showed an insignificant loss over 10 h along with immobile CO F.E., suggesting its high stability. The cell displayed a rapid and retrievable transient photocurrent response with ON/OFF illumination circulation under simulated sunlight irradiation at different potentials, implying robust charge transport property.

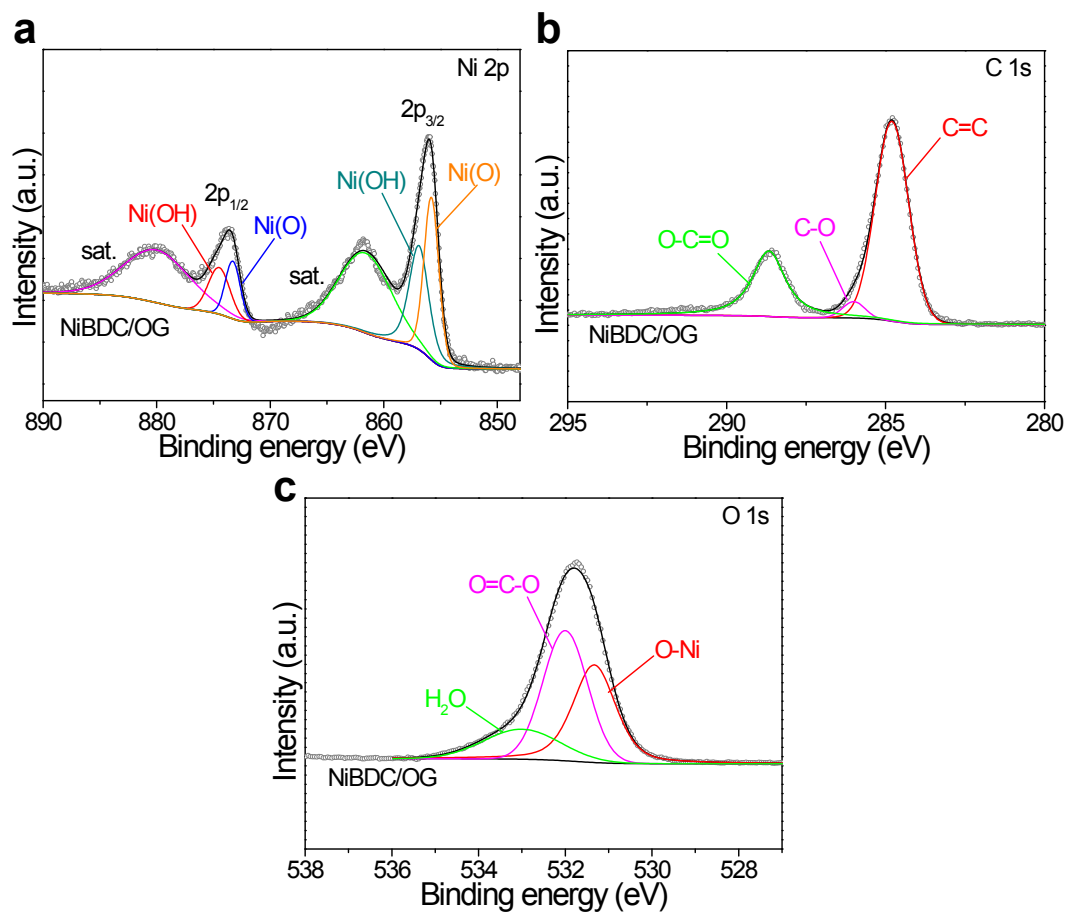

**Figure S26.** High-resolution XPS spectra for (a) Ni 2p, (b) C 1s, and (c) O 1s of NiBDC/OG.

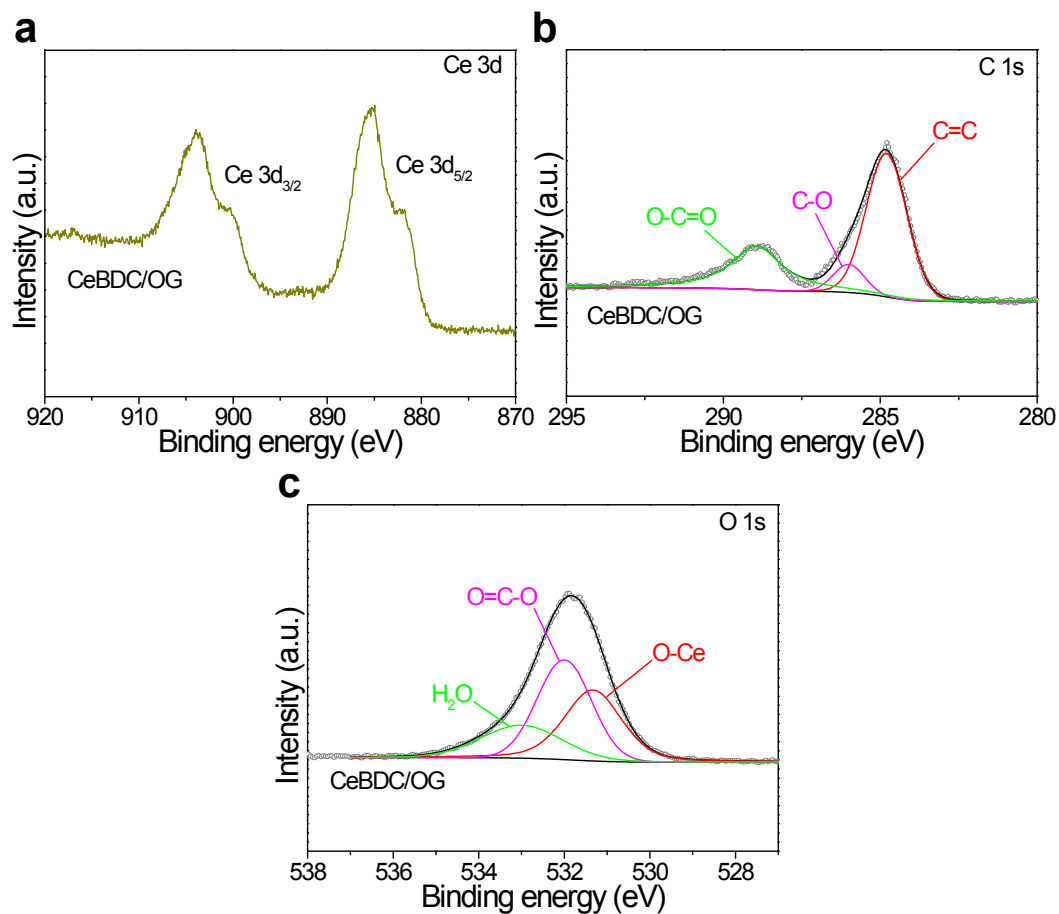

**Figure S27.** High-resolution XPS spectra for (a) Ce 3d, (b) C 1s, and (c) O 1s of CeBDC/OG.

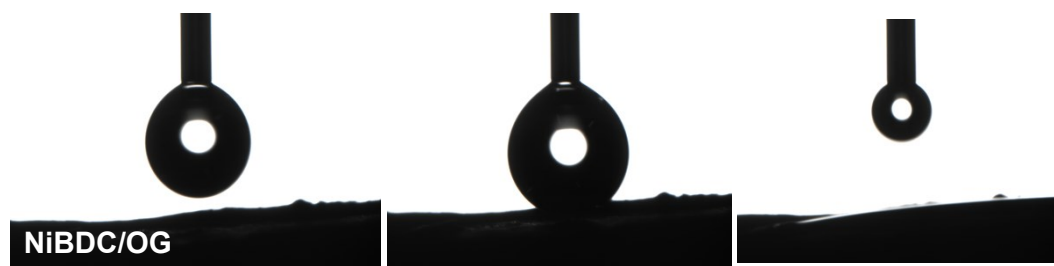

**Figure S28.** Static-water-droplet contact angles of NiBDC/OG.



**Table S1.** The EIS results of Ce-NiBDC/OG with other control electrodes in 1.0 M KOH solution in this work.

| Sample electrode | $R_s/\Omega$ | $R_{ct}/\Omega$ |
|------------------|--------------|-----------------|
| CeBDC/OG         | 1.33         | 54.1            |
| Ir/C             | 1.34         | 15.7            |
| NiBDC/OG         | 1.22         | 5.16            |
| Ce-NiBDC/OG      | 0.93         | 1.73            |

**Table S2.** Comparison of electrocatalytic OER performances of Ce-NiBDC/OG with other reported MOF-based OER catalysts in alkaline media.

| Catalyst                                                                            | electrolyte      | Overpotential<br>@10 mA cm <sup>-2</sup> | Tafel slope<br>(mV dec <sup>-1</sup> ) | Ref.             |
|-------------------------------------------------------------------------------------|------------------|------------------------------------------|----------------------------------------|------------------|
| Ni-UMOFNs                                                                           | 1.0 M KOH        | 321                                      | 65                                     | 8                |
| Ni-MOF@Fe-MOF                                                                       | 1.0 M KOH        | 265                                      | 82                                     | 7                |
| A <sub>2.7</sub> B-MOF-FeCo <sub>1.6</sub>                                          | 1.0 M KOH        | 288                                      | 39                                     | 9                |
| (Ni <sub>2</sub> Co <sub>1</sub> ) <sub>0.925</sub> Fe <sub>0.075</sub> -<br>MOF-NF | 1.0 M KOH        | 257                                      | 41.3                                   | 10               |
| Co-BDC/Ti <sub>3</sub> C <sub>2</sub> T <sub>x</sub>                                | 1.0 M KOH        | 410                                      | 48.2                                   | 11               |
| MAF-X27-OH                                                                          | pH=14            | 320                                      | 66                                     | 12               |
| NNU-23                                                                              | 0.1 M KOH        | 365                                      | 77.2                                   | 13               |
| Co-WOC-1                                                                            | 0.1 M KOH        | 390                                      | 128                                    | 14               |
| CUMSS-ZIF-67                                                                        | 1.0 M KOH        | 320                                      | 53.7                                   | 15               |
| <b>Ce-NiBDC/OG</b>                                                                  | <b>1.0 M KOH</b> | <b>265</b>                               | <b>46</b>                              | <b>This work</b> |

**Table S3.** Fitting parameters of Ni K-edge and Ce L-edge EXAFS curves for Ce-NiBDC/OG first shell.

| Path | Coordination number (CN) | Bond distance (R (Å)) | $\Delta E_0$ (eV) | $\sigma^2$ ( $10^{-3}$ Å <sup>2</sup> ) | R-factor |
|------|--------------------------|-----------------------|-------------------|-----------------------------------------|----------|
| Ni-O | $5.8 (6) \pm 0.3$        | $2.03 \pm 0.02$       | -2.0              | $5.6 \pm 0.6$                           | 0.007    |
| Ce-O | $6.1 (6) \pm 0.4$        | $2.38 \pm 0.03$       | -3.8              | $7.4 \pm 0.8$                           | 0.009    |

**Table S4.** The correction values of zero point energy and entropy of the adsorbed species.

|      | ZPE (eV) | TS (eV) |
|------|----------|---------|
| *OH  | 0.365    | 0.098   |
| *O   | 0.066    | 0.049   |
| *OOH | 0.458    | 0.156   |

## References

- 1 C. Lei, Q. Zheng, F. Cheng, Y. Hou, B. Yang, Z. Li, Z. Wen, L. Lei, G. Chai and X. Feng, *Adv. Funct. Mater.*, 2020, **30**, 2003000.
- 2 G. Kresse and J. Furthmüller, *Comput. Mater. Sci.*, 1996, **6**, 15-50.
- 3 P. E. Blöchl, *Phys. Rev. B*, 1994, **50**, 17953-17979.
- 4 J. P. Perdew, J. A. Chevary, S. H. Vosko, K. A. Jackson, M. R. Pederson, D. J. Singh and C. Fiolhais, *Phys. Rev. B*, 1992, **46**, 6671-6687.
- 5 J. Rossmeisl, A. Logadottir and J. K. Nørskov, *Chem. Phys.*, 2005, **319**, 178-184.
- 6 W. Li, F. Li, H. Yang, X. Wu, P. Zhang, Y. Shan and L. Sun, *Nat. Commun.*, 2019, **10**, 5074.
- 7 K. Rui, G. Zhao, Y. Chen, Y. Lin, Q. Zhou, J. Chen, J. Zhu, W. Sun, W. Huang and S. X. Dou, *Adv. Funct. Mater.*, 2018, **28**, 1801554.
- 8 S. Zhao, Y. Wang, J. Dong, C.-T. He, H. Yin, P. An, K. Zhao, X. Zhang, C. Gao, L. Zhang, J. Lv, J. Wang, J. Zhang, A. M. Khattak, N. A. Khan, Z. Wei, J. Zhang, S. Liu, H. Zhao and Z. Tang, *Nat. Energy*, 2016, **1**, 16184.
- 9 Z. Xue, Y. Li, Y. Zhang, W. Geng, B. Jia, J. Tang, S. Bao, H.-P. Wang, Y. Fan, Z.-w. Wei, Z. Zhang, Z. Ke, G. Li and C.-Y. Su, *Adv. Energy Mater.*, 2018, **8**, 1801564.
- 10 Q. Qian, Y. Li, Y. Liu, L. Yu and G. Zhang, *Adv. Mater.*, 2019, **31**, e1901139.
- 11 L. Zhao, B. Dong, S. Li, L. Zhou, L. Lai, Z. Wang, S. Zhao, M. Han, K. Gao, M. Lu, X. Xie, B. Chen, Z. Liu, X. Wang, H. Zhang, H. Li, J. Liu, H. Zhang, X. Huang and W. Huang, *ACS Nano*, 2017, **11**, 5800-5807.
- 12 X.-F. Lu, P.-Q. Liao, J.-W. Wang, J.-X. Wu, X.-W. Chen, C.-T. He, J.-P. Zhang, G.-R. Li and X.-M. Chen, *J. Am. Chem. Soc.*, 2016, **138**, 8336-8339.
- 13 X.-L. Wang, L.-Z. Dong, M. Qiao, Y.-J. Tang, J. Liu, Y. Li, S.-L. Li, J.-X. Su and Y.-Q. Lan, *Angew. Chem. Int. Ed.*, 2018, **57**, 9660-9664.
- 14 P. Manna, J. Debgupta, S. Bose and S. K. Das, *Angew. Chem. Int. Ed.*, 2016, **55**, 2425-2430.
- 15 L. Tao, C.-Y. Lin, S. Dou, S. Feng, D. Chen, D. Liu, J. Huo, Z. Xia and S.

Wang, *Nano Energy*, 2017, **41**, 417-425.
